# Supplementary material for: OASIS: Online Application for the Survival Analysis of Lifespan Assays Performed in Aging Research
Source: PubMed Central journal article supplement (PMC3156233; doi:10.1371/journal.pone.0023525), 2011-08-15
Supplement: pone.0023525.s001.pdf [file pone.0023525.s001.pdf]

# **OASIS: Online Application for the Survival Analysis of Lifespan Assays**

## **Performed in Aging Research**

### **Supplementary Information**

Supplementary Methods

Supplementary References

## Supplementary Methods

### Basic survival analysis

#### Variance of the survival function

The variance of *Kaplan-Meier* estimator at the time point  $t_i$  can be estimated by Greenwood's formula. Although the calculated variance tends to underestimate the true variance of the *Kaplan-Meier* estimator for moderate-sized samples, it is relatively close to the true variance and therefore commonly used in various studies [1].

$$\widehat{V}[\widehat{S}(t_i)] = \widehat{S}(t_i)^2 \sum_{j:t_j \leq t_i} \frac{d_j}{n_j(n_j - d_j)},$$

where  $\widehat{S}(t_i)$  is the *Kaplan-Meier* estimator,  $d_j$  is the number of deaths and  $n_j$  is the size of the population at risk during the  $j^{th}$  interval. Standard error of *Kaplan-Meier* estimator was given by  $\{\widehat{V}[\widehat{S}(t_i)]\}^{1/2}$ .

#### Mean and median lifespan

The Irwin's restricted mean lifespan [2], which was also described by Kaplan and Meier [3], was estimated as the area under the survival curve by the following formula.

$$\widehat{\mu}_\tau = \int_0^\tau \widehat{S}(t) dt,$$

where  $\tau$  is the largest observed time and  $\widehat{S}(t)$  is estimated with the *Kaplan-Meier* method.

The median survival time is also commonly used for survival analysis to measure effectiveness of specific treatments or to summarize lifespan data.

$$\widehat{t}_{0.5} = \min(t : \widehat{S}(t) \leq 0.5)$$

### Variance of mean and median lifespan and confidence interval

The variance of restricted mean lifespan is calculated using the following equation.

$$\widehat{V}[\widehat{\mu}_\tau] = \sum_{i:t_i \leq \tau} \left[ \int_{t_i}^{\tau} \widehat{S}(t) dt \right]^2 \frac{d_i}{n_i(n_i - d_i)}$$

A 95% confidence interval for the restricted mean is calculated as

$$\widehat{\mu}_\tau \pm 1.96 \sqrt{\widehat{V}[\widehat{\mu}_\tau]}$$

We used a 95% confidence interval for median lifespan  $\widehat{t}_{0.5}$ , based on the linear confidence interval [4]. It takes a set of all time points  $t$  as a confidence interval that satisfies the following condition.

$$-1.96 \leq \frac{\widehat{S}(t) - 0.5}{\widehat{V}^{1/2}[\widehat{S}(t)]} \leq 1.96$$

The statistical analysis results using OASIS were identical with those calculated with STATA (Supplementary Table 2).

### Lifespan at variable mortality percentages

Mortality is a measure of the death percentage in a given population. Time point at a specific mortality of population can be estimated with a survival function. Generally, survival times at 25%, 50%, 75%, or 90% mortality percentages are compared between different survival data. In the OASIS, Fisher's exact test is provided for statistical comparison at those time points.

### Survival and log-cumulative hazard plots

A survival plot shows the relationship between the survival percentage and time, representing the number or population of organisms surviving at each age for a given group. Log

cumulative hazard plot shows changes of mortality rates over specified time period. Mortality rate means the ratio of total deaths in total population over specified period of time. For example, a mortality rate of 11 % in a population of 1,000,000 would mean 1,100 deaths per unit time.

## Cox proportional hazards regression

### Partial likelihood estimator

OASIS provides two kinds of regression methods using partial likelihood estimator (PLE) and robust estimator through *coxr* function in the R package [5]. The PLE is generally used to estimate the regression coefficients by maximizing the partial likelihood

$$L(\beta) = \prod_{i=1}^n \left[ \frac{\exp(\beta^T X_i)}{\sum_{t_j \geq t_i} \exp(\beta^T X_j)} \right]^{\delta_i}, \delta_i = \begin{cases} 1 & \text{for the deaths observed} \\ 0 & \text{otherwise} \end{cases},$$

where  $\beta$  is a  $k \times 1$  vector of regression coefficients,  $X_i$  is a  $k \times 1$  vector of risk factors, and  $t_i$  is a observed time of event. To estimate  $\beta$ , which maximizes the partial likelihood, Cox's estimator solves the following score function that is the derivative with respect to  $\beta$  of the log partial likelihood function.

$$\sum_{i=1}^n \left[ X_i - \frac{\sum_{t_j \geq t_i} X_j \exp(\beta^T X_j)}{\sum_{t_j \geq t_i} \exp(\beta^T X_j)} \right] \delta_i = 0,$$

where  $t_i$  is a observed time of event and  $\delta_i$  equals 1 for the deaths observed and 0 otherwise.

### Robust estimator

While the PLE is commonly used for Cox proportional hazards regression, it is known to be sensitive to outliers and the deflection of underlying assumption [6]. Especially the PLE method is strongly influenced by large values of  $t \exp(\beta^T X)$ . To reduce the influence of large values of  $t \exp(\beta^T X)$ , Minder and Bednarski introduced smooth modification to the score function of the partial likelihood method [6],

$$\sum_{i=1}^n A(t_i, X_i) \left[ X_i - \frac{\sum_{t_j \geq t_i} A(t_i, X_j) X_j \exp(\beta^T X_j)}{\sum_{t_j \geq t_i} A(t_i, X_j) \exp(\beta^T X_j)} \right] \delta_i = 0,$$

where smooth function  $A(t_i, X_i)$  is defined as  $A(t_i, X_i) = M - \min(M, t_i \exp(\beta^T X_i))$  and  $M$  is a 95th percentile of the samples  $[t_1 \exp(\beta^T X_1), \dots, t_n \exp(\beta^T X_n)]$ . The smooth functions in the outer and inside sum have an reducing effect on large values of  $t \exp(\beta^T X)$  and  $\beta^T X$  respectively. OASIS adopted *coxr* function implemented in the R packages [5] to provide robust estimation. In the *coxr* function, a better solution for smooth function  $A(t_i, X_i)$  is used by using  $\Lambda(t) \exp(\beta^T X)$  instead of heuristic  $t \exp(\beta^T X_i)$ , where  $\Lambda(t)$  is  $-\log S(t)$ .

### Supplementary References

1. Jewell NP, Lei X, Ghani AC, Donnelly CA, Leung GM, et al. (2007) Non-parametric estimation of the case fatality ratio with competing risks data: an application to Severe Acute Respiratory Syndrome (SARS). *Stat Med* 26: 1982-1998.
2. Irwin JO (1949) The standard error of an estimate of expectation of life, with special reference to expectation of tumourless life in experiments with mice. *J Hyg (Lond)* 47: 188.
3. Kaplan EL, Meier P (1958) Nonparametric estimation from incomplete observations. *Journal of the American Statistical Association* 53: 457-481.
4. Brookmeyer R, Crowley J (1982) A confidence interval for the median survival time. *Biometrics* 38: 29-41.
5. R Development Core Team and contributors worldwide, 2008.
6. Minder CE, Bednarski T (1996) A robust method for proportional hazards regression. *Stat Med* 15: 1033-1047.
