# Supplementary material for: OASIS: Online Application for the Survival Analysis of Lifespan Assays Performed in Aging Research
Source: PubMed Central journal article supplement (PMC3156233; doi:10.1371/journal.pone.0023525), 2011-08-15
Supplement: pone.0023525.s002.pdf [file pone.0023525.s002.pdf]

Table S1. Statistical methods used for survival analyses

| Index | Paper                      | Graph          |                                               | Statistical Test |                        |                     |            |        |          |                   | Lifespan Statistics |               |                 |                        |                                   |
|-------|----------------------------|----------------|-----------------------------------------------|------------------|------------------------|---------------------|------------|--------|----------|-------------------|---------------------|---------------|-----------------|------------------------|-----------------------------------|
|       |                            | Survival Curve | Log Cumulative Hazard Plot or Mortality Curve | Log Rank Test    | Wilcoxon Rank-Sum Test | Fisher's Exact Test | Cox's test | T-Test | Gompertz | Mann-Whitney Test | Maximum Lifespan    | Mean Lifespan | Median Lifespan | Last quartile lifespan | Intercept mortality rate function |
| 1     | Alcedo and Kenyon, 2004    | 0              |                                               | 0                |                        |                     |            |        |          |                   | 0                   |               | 0               |                        |                                   |
| 2     | Andrade et al., 2005       |                |                                               |                  |                        | 0                   |            |        |          |                   |                     |               |                 |                        |                                   |
| 3     | Bauer et al., 2007         | 0              |                                               | 0                |                        |                     |            |        |          |                   | 0                   | 0             | 0               |                        |                                   |
| 4     | Bishop and Guarente, 2007  | 0              |                                               | 0                |                        |                     |            |        |          |                   | 0                   |               | 0               |                        |                                   |
| 5     | Blüher et al., 2003        | 0              |                                               | 0                |                        |                     |            |        |          |                   |                     |               |                 |                        |                                   |
| 6     | Budovskaya et al., 2008    | 0              |                                               | 0                |                        |                     |            |        |          |                   |                     |               |                 |                        |                                   |
| 7     | Civetta and Clark, 2000    |                | 0                                             |                  |                        |                     |            |        |          |                   | 0                   |               |                 | 0                      | 0                                 |
| 8     | Clancy et al., 2001        | 0              |                                               | 0                |                        |                     |            |        |          |                   | 0                   |               | 0               |                        |                                   |
| 9     | Cohen et al., 2006         | 0              |                                               | 0                |                        |                     |            |        |          |                   | 0                   |               |                 |                        |                                   |
| 10    | Cristina et al., 2009      | 0              |                                               | 0                |                        |                     |            |        |          |                   | 0                   |               |                 |                        |                                   |
| 11    | Curran and Ruvkun, 2007    |                |                                               | 0                |                        |                     |            |        |          |                   | 0                   |               | 0               |                        |                                   |
| 12    | Doonan et al., 2008        | 0              |                                               | 0                |                        |                     |            |        |          |                   | 0                   |               |                 |                        |                                   |
| 13    | Evason et al., 2005        | 0              |                                               |                  |                        |                     |            |        |          |                   | 0                   |               |                 |                        |                                   |
| 14    | Fabrizio et al., 2005      | 0              |                                               |                  |                        |                     |            |        |          |                   | 0                   |               |                 |                        |                                   |
| 15    | Fox et al., 2004           | 0              | 0                                             |                  |                        |                     |            |        | 0        |                   | 0                   |               |                 |                        | 0                                 |
| 16    | Gallagher et al., 2000     |                |                                               |                  |                        | 0                   |            |        |          |                   | 0                   |               |                 |                        |                                   |
| 17    | Gerisch et al., 2001       | 0              |                                               |                  |                        |                     |            | 0      |          | 0                 | 0                   |               | 0               |                        |                                   |
| 18    | Gerisch et al., 2007       | 0              |                                               | 0                |                        |                     |            |        |          |                   | 0                   |               |                 |                        |                                   |
| 19    | Greer et al., 2007         | 0              | 0                                             |                  |                        |                     |            |        |          |                   | 0                   |               | 0               |                        |                                   |
| 20    | Hansen et al., 2007        | 0              |                                               | 0                |                        |                     |            |        |          |                   | 0                   |               |                 |                        |                                   |
| 21    | Hansen et al., 2008        | 0              |                                               | 0                |                        |                     |            |        |          |                   | 0                   |               |                 |                        |                                   |
| 22    | Harrison et al., 2009      | 0              |                                               | 0                |                        | 0                   |            |        |          |                   | 0                   |               | 0               |                        |                                   |
| 23    | Holznerberger et al., 2003 | 0              |                                               | 0                |                        |                     | 0          | 0      |          |                   | 0                   |               |                 |                        |                                   |
| 24    | Honjoh et al., 2009        | 0              |                                               | 0                |                        |                     |            | 0      |          |                   | 0                   |               |                 |                        |                                   |
| 25    | Hwangbo et al., 2004       | 0              |                                               |                  |                        |                     |            |        |          |                   | 0                   |               | 0               |                        |                                   |
| 26    | Joeng et al., 2004         | 0              |                                               | 0                |                        |                     |            |        |          |                   | 0                   |               |                 |                        |                                   |
| 27    | Kapahi et al., 2004        | 0              |                                               | 0                |                        |                     |            |        |          |                   | 0                   |               |                 |                        |                                   |
| 28    | Lambert et al., 2004       | 0              |                                               | 0                |                        | 0                   |            |        |          |                   |                     |               |                 |                        |                                   |
| 29    | Li et al., 2008            | 0              |                                               | 0                |                        |                     |            |        |          |                   | 0                   |               |                 |                        |                                   |
| 30    | Libert et al., 2007        | 0              | 0                                             | 0                |                        |                     |            |        |          |                   | 0                   |               | 0               |                        |                                   |
| 31    | Liu et al., 2005           | 0              |                                               | 0                |                        |                     |            |        |          |                   | 0                   |               | 0               |                        |                                   |
| 32    | Mair et al., 2003          |                | 0                                             |                  |                        |                     |            |        |          |                   | 0                   |               |                 |                        | 0                                 |
| 33    | Matheu et al., 2007        | 0              |                                               | 0                |                        |                     |            |        | 0        |                   | 0                   |               | 0               |                        |                                   |
| 34    | Mehta et al., 2009         | 0              |                                               |                  | 0                      |                     |            |        |          |                   | 0                   |               |                 |                        |                                   |
| 35    | Morley and Morimoto, 2004  | 0              |                                               |                  |                        |                     |            |        |          |                   | 0                   |               |                 |                        |                                   |
| 36    | Olsen et al., 2006         | 0              |                                               |                  |                        |                     |            |        |          |                   | 0                   |               |                 |                        |                                   |
| 37    | Padmanabhan et al., 2009   | 0              |                                               |                  |                        |                     |            |        |          |                   | 0                   |               |                 |                        |                                   |
| 38    | Petrasccheck et al., 2007  | 0              |                                               | 0                |                        |                     |            |        |          |                   | 0                   |               |                 |                        |                                   |
| 39    | Ren et al., 2007           | 0              |                                               | 0                |                        |                     |            |        |          |                   | 0                   |               | 0               |                        |                                   |
| 40    | Schriner et al., 2005      | 0              |                                               |                  |                        |                     |            |        |          |                   | 0                   |               | 0               |                        |                                   |
| 41    | Shaw et al., 2007          | 0              |                                               |                  |                        |                     |            |        |          |                   | 0                   |               |                 |                        |                                   |
| 42    | Sheridan et al., 2000      |                |                                               |                  |                        | 0                   |            |        |          |                   |                     |               |                 |                        |                                   |
| 43    | Smith et al., 2008         | 0              |                                               |                  | 0                      |                     |            |        |          |                   | 0                   |               |                 |                        |                                   |
| 44    | Steffen et al., 2008       | 0              |                                               |                  | 0                      |                     |            |        |          |                   | 0                   |               |                 |                        |                                   |
| 45    | Syntichaki et al., 2007    | 0              |                                               |                  |                        |                     |            |        |          |                   | 0                   |               |                 |                        |                                   |
| 46    | Tong et al., 2007          | 0              |                                               | 0                |                        |                     |            |        |          |                   | 0                   |               | 0               |                        |                                   |
| 47    | Valenzano et al., 2006     | 0              | 0                                             | 0                |                        |                     |            |        |          |                   | 0                   |               | 0               |                        | 0                                 |
| 48    | Viswanathan et al., 2005   | 0              |                                               | 0                |                        |                     |            |        |          |                   | 0                   |               |                 |                        |                                   |
| 49    | Wang et al., 2005          | 0              |                                               | 0                |                        |                     |            |        |          |                   | 0                   |               |                 |                        |                                   |
| 50    | Wilson et al., 2006        | 0              |                                               | 0                |                        |                     |            |        |          |                   | 0                   |               |                 |                        |                                   |
| 51    | Wood et al., 2004          | 0              | 0                                             | 0                |                        |                     |            |        |          |                   | 0                   |               | 0               |                        |                                   |
| 52    | Wu et al., 2009            | 0              | 0                                             |                  |                        |                     |            |        | 0        |                   | 0                   |               |                 |                        |                                   |
| 53    | Xue et al., 2007           | 0              |                                               | 0                |                        |                     |            |        |          |                   | 0                   |               |                 |                        |                                   |

## References

- Alcedo, J. and Kenyon, C., 2004. Regulation of *C. elegans* longevity by specific gustatory and olfactory neurons. *Neuron* 41, 45-55.
- Andrade, M.C., Gu, L. and Stoltz, J.A., 2005. Novel male trait prolongs survival in suicidal mating. *Biol Lett* 1, 276-279.
- Bauer, J.H., Chang, C., Morris, S.N., Hozier, S., Andersen, S., Waitzman, J.S. and Helfand, S.L., 2007. Expression of dominant-negative Dmp53 in the adult *Drosophila* brain inhibits insulin signaling. *Proc Natl Acad Sci U S A* 104, 13355-13360.
- Bishop, N.A. and Guarente, L., 2007. Two neurons mediate diet-restriction-induced longevity in *C. elegans*. *Nature* 447, 545-549.
- Blüher, M., Kahn, B.B. and Kahn, C.R., 2003. Extended longevity in *mouse* lacking the insulin receptor in adipose tissue. *Science* 299, 572-574.
- Budovskaya, Y.V., Wu, K., Southworth, L.K., Jiang, M., Tedesco, P., Johnson, T.E. and Kim, S.K., 2008. An elt-3/elt-5/elt-6 GATA transcription circuit guides aging in *C. elegans*. *Cell* 134, 291-303.
- Civetta, A. and Clark, A.G., 2000. Correlated effects of sperm competition and postmating female mortality. *Proc Natl Acad Sci U S A* 97, 13162-13165.
- Clancy, D.J., Gems, D., Harshman, L.G., Oldham, S., Stocker, H., Hafen, E., Leivers, S.J. and Partridge, L., 2001. Extension of life-span by loss of CHICO, a *Drosophila* insulin receptor substrate protein. *Science* 292, 104-106.
- Cohen, E., Bieschke, J., Percivalle, R.M., Kelly, J.W. and Dillin, A., 2006. Opposing activities protect against age-onset proteotoxicity. *Science* 313, 1604-1610.
- Cristina, D., Cary, M., Lunceford, A., Clarke, C. and Kenyon, C., 2009. A regulated response to impaired respiration slows behavioral rates and increases lifespan in *Caenorhabditis elegans*. *PLoS Genet* 5, e1000450.
- Curran, S.P. and Ruvkun, G., 2007. Lifespan regulation by evolutionarily conserved genes essential for viability. *PLoS Genet* 3, e56.
- Doonan, R., McElwee, J.J., Matthijsens, F., Walker, G.A., Houthoofd, K., Back, P., Matscheski, A., Vanfleteren, J.R. and Gems, D., 2008. Against the oxidative damage theory of aging: superoxide dismutases protect against oxidative stress but have little or no effect on life span in *Caenorhabditis elegans*. *Genes Dev* 22, 3236-3241.
- Evason, K., Huang, C., Yamben, I., Covey, D.F. and Kornfeld, K., 2005. Anticonvulsant medications extend worm life-span. *Science* 307, 258-262.
- Fabrizio, P., Gattazzo, C., Battistella, L., Wei, M., Cheng, C., McGrew, K. and Longo, V.D., 2005. Sir2 blocks extreme life-span extension. *Cell* 123, 655-667.
- Fox, C.W., Bush, M.L., Roff, D.A. and Wallin, W.G., 2004. Evolutionary genetics of lifespan and mortality rates in two populations of the seed beetle, *Callosobruchus maculatus*. *Heredity* 92, 170-181.
- Gallagher, I.M., Jenner, P., Glover, V. and Clow, A., 2000. CuZn-superoxide dismutase transgenic *mouse*: no effect on longevity, locomotor activity and 3H-mazindol and 3H-spiperone binding over 19 months. *Neurosci Lett* 289, 221-223.
- Gerisch, B., Rottiers, V., Li, D., Motola, D.L., Cummins, C.L., Lehrach, H., Mangelsdorf, D.J. and Antebi, A., 2007. A bile acid-like steroid modulates *Caenorhabditis elegans* lifespan through nuclear receptor signaling. *Proc Natl Acad Sci U S A* 104, 5014-5019.
- Gerisch, B., Weitzel, C., Köber-Eisermann, C., Rottiers, V. and Antebi, A., 2001. A hormonal signaling pathway influencing *C. elegans* metabolism, reproductive development, and life span. *Dev Cell* 1, 841-851.
- Greer, E.L., Dowlatbadi, D., Banko, M.R., Villen, J., Hoang, K., Blanchard, D., Gygi, S.P. and Brunet, A., 2007. An AMPK-FOXO pathway mediates longevity induced by a novel method of dietary restriction in *C. elegans*. *PLoS Genet* 4, e24.
- Hansen, M., Chandria, A., Mitis, L.L., Oikari, B., Driscoll, M. and Kenyon, C., 2008. A role for autophagy in the extension of lifespan by dietary restriction in *C. elegans*. *PLoS Genet* 4, e24.
- Hansen, M., Taubert, S., Crawford, D., Libina, N., Lee, S.J. and Kenyon, C., 2007. Lifespan extension by conditions that inhibit translation in *Caenorhabditis elegans*. *Aging Cell* 6, 95-110.
- Harrison, D.E., Strong, R., Sharp, Z.D., Nelson, J.F., Astle, C.M., Flurkey, K., Nadon, N.L., Wilkinson, J.E., Frenkel, K., Carter, C.S., Pahor, M., Javors, M.A., Fernandez, E. and Miller, R.A., 2009. Rapamycin fed late in life extends lifespan in genetically heterogeneous *mouse*. *Nature* 460, 392-395.

23 Holzenberger, M., Dupont, J., Ducos, B., Leneuve, P., Geloën, A., Even, P.C., Cervera, P. and Le Bouc, Y., 2003. IGF-1 receptor regulates lifespan and resistance to oxidative stress in *mice*. *Nature* 421, 182-187.

24 Honjoh, S., Yamamoto, T., Uno, M. and Nishida, E., 2009. Signalling through RHEB-1 mediates intermittent fasting-induced longevity in *C. elegans*. *Nature* 457, 726-730.

25 Hwangbo, D.S., Gershman, B., Tu, M.P., Palmer, M. and Tatar, M., 2004. *Drosophila* dFOXO controls lifespan and regulates insulin signalling in brain and fat body. *Nature* 429, 562-566.

26 Joeng, K.S., Song, E.J., Lee, K.J. and Lee, J., 2004. Long lifespan in worms with long telomeric DNA. *Nat Genet* 36, 607-611.

27 Kapahi, P., Zid, B.M., Harper, T., Koslover, D., Sapin, V. and Benzer, S., 2004. Regulation of lifespan in *Drosophila* by modulation of genes in the TOR signaling pathway. *Curr Biol* 14, 885-890.

28 Lambert, H.E., Gregory, W.M., Nelstrop, A.E. and Rustin, G.J., 2004. Long-term survival in 463 women treated with platinum analogs for advanced epithelial carcinoma of the ovary: life expectancy compared to women of an age-matched normal population. *Int J Gynecol Cancer* 14, 772-778.

29 Li, J., Ebata, A., Dong, Y., Rizki, G., Iwata, T. and Lee, S.S., 2008. *Caenorhabditis elegans* HCF-1 functions in longevity maintenance as a DAF-16 regulator. *PLoS Biol* 6, e233.

30 Libert, S., Zwiener, J., Chu, X., Vanvoorthies, W., Roman, G. and Pletcher, S.D., 2007. Regulation of *Drosophila* life span by olfaction and food-derived odors. *Science* 315, 1133-1137.

31 Liu, X., Jiang, N., Hughes, B., Bigras, E., Shoubridge, E. and Hekimi, S., 2005. Evolutionary conservation of the clk-1-dependent mechanism of longevity: loss of mkl1 increases cellular fitness and lifespan in *mice*. *Genes Dev* 19, 2424-2434.

32 Mair, W., Goymer, P., Pletcher, S.D. and Partridge, L., 2003. Demography of dietary restriction and death in *Drosophila*. *Science* 301, 1731-1733.

33 Matheu, A., Maraver, A., Klait, P., Flores, I., Garcia-Cao, I., Borrás, C., Flores, J.M., Vina, J., Blasco, M.A. and Serrano, M., 2007. Delayed ageing through damage protection by the Arf/p53 pathway. *Nature* 448, 375-379.

34 Mehta, R., Steinkraus, K.A., Sutphin, G.L., Ramos, F.J., Shamieh, L.S., Huh, A., Davis, C., Chandler-Brown, D. and Kaerberlein, M., 2009. Proteasomal regulation of the hypoxic response modulates aging in *C. elegans*. *Science* 324, 1196-1198.

35 Morley, J.F. and Morimoto, R.I., 2004. Regulation of longevity in *Caenorhabditis elegans* by heat shock factor and molecular chaperones. *Mol Biol Cell* 15, 657-664.

36 Olsen, A., Vantipalli, M.C. and Lithgow, G.J., 2006. Checkpoint proteins control survival of the postmitotic cells in *Caenorhabditis elegans*. *Science* 312, 1381-1385.

37 Padmanabhan, S., Mukhopadhyay, A., Narasimhan, S.D., Tesz, G., Czech, M.P. and Tissenbaum, H.A., 2009. A PP2A regulatory subunit regulates *C. elegans* insulin/IGF-1 signaling by modulating AKT-1 phosphorylation. *Cell* 136, 939-951.

38 Petrascheck, M., Ye, X. and Buck, L.B., 2007. An antidepressant that extends lifespan in adult *Caenorhabditis elegans*. *Nature* 450, 553-556.

39 Ren, C., Webster, P., Finkel, S.E. and Tower, J., 2007. Increased internal and external bacterial load during *Drosophila* aging without life-span trade-off. *Cell Metab* 6, 144-152.

40 Schirner, S.E., Linford, N.J., Martin, G.M., Treuting, P., Ogburn, C.E., Emond, M., Coskun, P.E., Ladiges, W., Wolf, N., Van Remmen, H., Wallace, D.C. and Rabinovitch, P.S., 2005. Extension of murine life span by overexpression of catalase targeted to mitochondria. *Science* 308, 1909-1911.

41 Shaw, W.M., Luo, S., Landis, J., Ashraf, J. and Murphy, C.T., 2007. The *C. elegans* TGF-beta Dauer pathway regulates longevity via insulin signaling. *Curr Biol* 17, 1635-1645.

42 Sheridan, R.L., Remensnyder, J.P., Schmitzer, J.J., Schulz, J.T., Ryan, C.M. and Tompkins, R.G., 2000. Current expectations for survival in pediatric burns. *Arch Pediatr Adolesc Med* 154, 245-249.

43 Smith, E.D., Tsuchiya, M., Fox, L.A., Dang, N., Hu, D., Kerr, E.O., Johnston, E.D., T'choo, B.N., Pak, D.N., Welton, K.L., Promislow, D.E., Thomas, J.H., Kaerberlein, M. and Kennedy, B.K., 2008. Quantitative evidence for conserved longevity pathways between divergent eukaryotic species. *Genome Res* 18, 564-570.

44 Steffen, K.K., Mackay, V.L., Kerr, E.O., Tsuchiya, M., Hu, D., Fox, L.A., Dang, N., Johnston, E.D., Oakes, J.A., T'choo, B.N., Pak, D.N., Fields, S., Kennedy, B.K. and Kaerberlein, M., 2008. *Yeast* life span extension by depletion of 60s ribosomal subunits is mediated by Gcn4. *Cell* 133, 292-302.

45 Synichaki, P., Troulimaki, K. and Tavernarakis, N., 2007. eIF4E function in somatic cells modulates ageing in *Caenorhabditis elegans*. *Nature* 445, 922-926.

46 Tong, J.J., Schirner, S.E., McCleary, D., Day, B.J. and Wallace, D.C., 2007. Life extension through neurofibromin mitochondrial regulation and antioxidant therapy for neurofibromatosis-1 in *Drosophila melanogaster*. *Nat Genet* 39, 476-485.

47 Valenzano, D.R., Terzibasi, E., Genade, T., Cattaneo, A., Domenici, L. and Cellierino, A., 2006. Resveratrol prolongs lifespan and retards the onset of age-related markers in a short-lived vertebrate. *Curr Biol* 16, 296-300.

48 Viswanathan, M., Kim, S.K., Berdichevsky, A. and Guarente, L., 2005. A role for SIR-2.1 regulation of ER stress response genes in determining *C. elegans* life span. *Dev Cell* 9, 605-615.

49 Wang, M.C., Bohmann, D. and Jasper, H., 2005. JNK extends life span and limits growth by antagonizing cellular and organism-wide responses to insulin signaling. *Cell* 121, 115-125.

50 Wilson, M.A., Shukitt-Hale, B., Kalt, W., Ingram, D.K., Joseph, J.A. and Wolkow, C.A., 2006. Blueberry polyphenols increase lifespan and thermotolerance in *Caenorhabditis elegans*. *Aging Cell* 5, 59-68.

51 Wood, J.G., Rogina, B., Lavu, S., Howitz, K., Helfand, S.L., Tatar, M. and Sinclair, D., 2004. Sirtuin activators mimic caloric restriction and delay ageing in metazoans. *Nature* 430, 686-689.

52 Wu, D., Cypser, J.R., Yashin, A.I. and Johnson, T.E., 2009. Multiple mild heat-shocks decrease the Gompertz component of mortality in *Caenorhabditis elegans*. *Exp Gerontol*

53 Xue, H., Xian, B., Dong, D., Xia, K., Zhu, S., Zhang, Z., Hou, L., Zhang, Q., Zhang, Y. and Han, J.D., 2007. A modular network model of aging. *Mol Syst Biol* 3, 147.
