# Supplementary material for: OASIS: Online Application for the Survival Analysis of Lifespan Assays Performed in Aging Research
Source: PubMed Central journal article supplement (PMC3156233; doi:10.1371/journal.pone.0023525), 2011-08-15
Supplement: pone.0023525.s003.pdf [file pone.0023525.s003.pdf]

**Table S2. Comparisons of OASIS results with reference data**

**Data 1**  
 URL: [http://www.weibull.com/LifeDataWeb/nonparametric\\_analysis.htm](http://www.weibull.com/LifeDataWeb/nonparametric_analysis.htm)  
 Solution to Additional Reliability Analysis Tools Example 8

| OASIS Result |         |      |          |                      |         |           |         |           | Reference Data |      |          |
|--------------|---------|------|----------|----------------------|---------|-----------|---------|-----------|----------------|------|----------|
| Time         | At Risk | Dead | Censored | Percent Mortality(%) | S_hat   | Var S_hat | SE(S)   | Surv_Time | Time           | Dead | S_hat    |
| 9            | 21      | 3    | 1        | 14.29%               | 0.85714 | 0.00583   | 0.07656 | 9         | 9              | 3    | 0.857143 |
| 11           | 17      | 1    | 0        | 19.33%               | 0.80672 | 0.00756   | 0.08694 | 10.71429  | 11             | 1    | 0.806723 |
| 12           | 16      | 0    | 1        | 19.33%               | 0.80672 | 0.00756   | 0.08694 | 11.52101  | 12             | 0    | 0.806723 |
| 13           | 15      | 1    | 1        | 24.71%               | 0.75294 | 0.00928   | 0.09635 | 12.32773  | 13             | 1    | 0.752941 |
| 15           | 13      | 0    | 1        | 24.71%               | 0.75294 | 0.00928   | 0.09635 | 13.83361  | 15             | 0    | 0.752941 |
| 17           | 12      | 1    | 0        | 30.98%               | 0.6902  | 0.01141   | 0.10681 | 15.3395   | 17             | 1    | 0.690196 |
| 21           | 11      | 0    | 0        | 37.25%               | 0.62745 | 0.01301   | 0.11405 | 18.10028  | 21             | 1    | 0.627451 |
| 22           | 10      | 0    | 1        | 37.25%               | 0.62745 | 0.01301   | 0.11405 | 18.72773  | 22             | 0    | 0.627451 |
| 24           | 9       | 0    | 1        | 37.25%               | 0.62745 | 0.01301   | 0.11405 | 19.98263  | 24             | 0    | 0.627451 |
| 26           | 8       | 0    | 1        | 37.25%               | 0.62745 | 0.01301   | 0.11405 | 21.23754  | 26             | 0    | 0.627451 |
| 28           | 7       | 1    | 0        | 46.22%               | 0.53782 | 0.01644   | 0.12823 | 22.49244  | 28             | 1    | 0.537815 |
| 30           | 6       | 1    | 0        | 55.18%               | 0.44818 | 0.01811   | 0.13459 | 23.56807  | 30             | 1    | 0.448179 |
| 32           | 5       | 0    | 1        | 55.18%               | 0.44818 | 0.01811   | 0.13459 | 24.46443  | 32             | 0    | 0.448179 |
| 35           | 4       | 0    | 2        | 55.18%               | 0.44818 | 0.01811   | 0.13459 | 25.80896  | 35             | 0    | 0.448179 |
| 39           | 2       | 0    | 1        | 55.18%               | 0.44818 | 0.01811   | 0.13459 | 27.60168  | 39             | 0    | 0.448179 |
| 41           | 1       | 0    | 1        | 55.18%               | 0.44818 | 0.01811   | 0.13459 | 28.49804  | 41             | 0    | 0.448179 |

**Data 2**  
 URL: <http://sbi.postech.ac.kr/oasis/introduction.html>  
 daf-2(e1370) and wild type treated with control or daf-16 RNAi (Example in OASIS web site)

| OASIS Result               |                 |       |           |                    | STATA Result               |          |          |           |                    |
|----------------------------|-----------------|-------|-----------|--------------------|----------------------------|----------|----------|-----------|--------------------|
| Strin                      | No. of subjects | mean  | Std. Err. | 95% Conf. Interval | strain                     | subjects | mean     | Std. Err. | 95% Conf. Interval |
| WT                         | 52              | 19.35 | 1.07      | 17.24 21.45        | WT                         | 52       | 19.34552 | 1.074908  | 17.2387 21.4523    |
| daf-2(e1370)               | 223             | 32.87 | 0.64      | 31.63 34.12        | daf-2(e1370)               | 223      | 32.87417 | 0.636561  | 31.6265 34.1218    |
| daf-16(RNAi)               | 127             | 17.74 | 0.43      | 16.91 18.57        | daf-16(RNAi)               | 127      | 17.7403  | 0.4258734 | 16.9056 18.575     |
| daf-16(RNAi); daf-2(e1370) | 366             | 20.84 | 0.46      | 19.94 21.73        | daf-16(RNAi); daf-2(e1370) | 366      | 20.83829 | 0.4564434 | 19.9437 21.7329    |

| OASIS Result |                           |               |           | STATA Result |                          |               |           |
|--------------|---------------------------|---------------|-----------|--------------|--------------------------|---------------|-----------|
| Type         | Name                      | Log-rank test | Pr > Chi2 | Type         | Name                     | Log-rank test | Pr > Chi2 |
| Control      | WT                        | Chi2          |           | Control      | WT                       | Chi2          |           |
|              | daf-2(e1370)              | 119.19        | 0.00E+00  |              | daf-2(e1370)             | 119.19        | 0.00E+00  |
|              | daf-16(RNAi)              | 5.03          | 2.50E-02  |              | daf-16(RNAi)             | 5.03          | 2.50E-02  |
|              | daf-16(RNAi); daf-2(e137) | 2.51          | 1.13E-01  |              | daf-16(RNAi); daf-2(e13) | 2.51          | 1.13E-01  |
| Control      | daf-2(e1370)              | 119.19        | 0.00E+00  | Control      | daf-2(e1370)             | 119.19        | 0.00E+00  |
|              | daf-16(RNAi)              | 206.82        | 0.00E+00  |              | daf-16(RNAi)             | 206.82        | 0.00E+00  |
|              | daf-16(RNAi); daf-2(e137) | 146.07        | 0.00E+00  |              | daf-16(RNAi); daf-2(e13) | 146.07        | 0.00E+00  |
| Control      | daf-16(RNAi)              | 5.03          | 2.50E-02  | Control      | daf-16(RNAi)             | 5.03          | 2.50E-02  |
|              | daf-2(e1370)              | 206.82        | 0.00E+00  |              | daf-2(e1370)             | 206.82        | 0.00E+00  |
|              | daf-16(RNAi); daf-2(e137) | 21.38         | 3.76E-06  |              | daf-16(RNAi); daf-2(e13) | 21.38         | 0.00E+00  |
| Control      | f-16(RNAi); daf-2(e137)   | 2.51          | 1.13E-01  | Control      | f-16(RNAi); daf-2(e1370) | 2.51          | 1.13E-01  |
|              | daf-2(e1370)              | 146.07        | 0.00E+00  |              | daf-2(e1370)             | 146.07        | 0.00E+00  |
|              | daf-16(RNAi)              | 21.38         | 3.76E-06  |              | daf-16(RNAi)             | 21.38         | 0.00E+00  |

**Data 3**  
 URL: [http://www.statsdirect.com/help/survival\\_analysis/kaplan.htm](http://www.statsdirect.com/help/survival_analysis/kaplan.htm)  
 Example of test workbook (Survival worksheet: Group Surv, Time Surv, Censor Surv)

| OASIS Result |         |      |          |                      |         |           |         |           | Reference Data |         |      |          |          |          |
|--------------|---------|------|----------|----------------------|---------|-----------|---------|-----------|----------------|---------|------|----------|----------|----------|
| Time         | At Risk | Dead | Censored | Percent Mortality(%) | S_hat   | Var S_hat | SE(S)   | Surv_Time | Time           | At risk | Dead | Censored | S        | SE(S)    |
| 142          | 22      | 1    | 0        | 4.55%                | 0.95455 | 0.00197   | 0.04441 | 142       | 142            | 22      | 1    | 0        | 0.954545 | 0.044409 |
| 157          | 21      | 1    | 0        | 9.09%                | 0.90909 | 0.00376   | 0.06129 | 156.31818 | 157            | 21      | 1    | 0        | 0.909091 | 0.061291 |
| 163          | 20      | 1    | 0        | 13.64%               | 0.86364 | 0.00535   | 0.07317 | 161.72723 | 163            | 20      | 1    | 0        | 0.863636 | 0.073165 |
| 198          | 19      | 1    | 0        | 18.18%               | 0.81818 | 0.00676   | 0.08223 | 192       | 198            | 19      | 1    | 0        | 0.818182 | 0.08223  |
| 204          | 18      | 0    | 1        | 18.18%               | 0.81818 | 0.00676   | 0.08223 | 196.90909 | 204            | 18      | 0    | 1        | 0.818182 | 0.08223  |
| 205          | 17      | 0    | 0        | 22.99%               | 0.77065 | 0.00817   | 0.09609 | 197.22727 | 205            | 17      | 1    | 0        | 0.770653 | 0.096087 |
| 232          | 16      | 3    | 0        | 37.43%               | 0.62567 | 0.01104   | 0.10507 | 218.51872 | 232            | 16      | 3    | 0        | 0.625668 | 0.105069 |
| 233          | 13      | 4    | 0        | 56.68%               | 0.43316 | 0.01171   | 0.10819 | 219.14439 | 233            | 13      | 4    | 0        | 0.433155 | 0.108192 |
| 239          | 9       | 1    | 0        | 61.50%               | 0.38503 | 0.01131   | 0.10634 | 221.74332 | 239            | 9       | 1    | 0        | 0.385027 | 0.106338 |
| 240          | 8       | 1    | 0        | 66.31%               | 0.3369  | 0.01068   | 0.10337 | 222.12834 | 240            | 8       | 1    | 0        | 0.336898 | 0.103365 |
| 261          | 7       | 1    | 0        | 71.12%               | 0.28877 | 0.00984   | 0.09917 | 229.20321 | 261            | 7       | 1    | 0        | 0.28877  | 0.099172 |
| 280          | 6       | 2    | 0        | 80.75%               | 0.19251 | 0.00746   | 0.08637 | 234.68984 | 280            | 6       | 2    | 0        | 0.192513 | 0.086369 |
| 295          | 4       | 2    | 0        | 90.37%               | 0.09626 | 0.00418   | 0.06466 | 237.57754 | 295            | 4       | 2    | 0        | 0.096257 | 0.064663 |
| 323          | 2       | 1    | 0        | 95.19%               | 0.04813 | 0.0022    | 0.04694 | 240.27273 | 323            | 2       | 1    | 0        | 0.048128 | 0.046941 |
| 344          | 1       | 0    | 1        | 95.19%               | 0.04813 | 0.0022    | 0.04694 | 241.28342 | 344            | 1       | 0    | 1        | 0.048128 | 0.046941 |

| OASIS Result         |                                          |  | Reference Data       |                                          |  |
|----------------------|------------------------------------------|--|----------------------|------------------------------------------|--|
| Median Survival Time | [ Brookmeyer-Crowley 95% Conf. Interval] |  | Median Survival Time | [ Brookmeyer-Crowley 95% Conf. Interval] |  |
| 233                  | 232 240                                  |  | 233                  | 232 240                                  |  |

| OASIS Result |         |      |          |                      |         |           |         |           | Reference Data |         |      |          |          |          |
|--------------|---------|------|----------|----------------------|---------|-----------|---------|-----------|----------------|---------|------|----------|----------|----------|
| Time         | At Risk | Dead | Censored | Percent Mortality(%) | S_hat   | Var S_hat | SE(S)   | Surv_Time | Time           | At risk | Dead | Censored | S        | SE(S)    |
| 143          | 19      | 1    | 0        | 5.26%                | 0.94737 | 0.00262   | 0.05123 | 143       | 143            | 19      | 1    | 0        | 0.947368 | 0.051228 |
| 165          | 18      | 1    | 0        | 10.53%               | 0.89474 | 0.00496   | 0.07041 | 163.84211 | 165            | 18      | 1    | 0        | 0.894737 | 0.070406 |
| 188          | 17      | 2    | 0        | 21.05%               | 0.78947 | 0.00875   | 0.09353 | 184.42105 | 188            | 17      | 2    | 0        | 0.789474 | 0.093529 |
| 190          | 15      | 1    | 0        | 26.32%               | 0.73684 | 0.01021   | 0.10102 | 186       | 190            | 15      | 1    | 0        | 0.736842 | 0.101023 |
| 192          | 14      | 1    | 0        | 31.58%               | 0.68421 | 0.01137   | 0.10664 | 187.47368 | 192            | 14      | 1    | 0        | 0.684211 | 0.106639 |
| 206          | 13      | 1    | 0        | 36.84%               | 0.63158 | 0.01225   | 0.11066 | 197.05263 | 206            | 13      | 1    | 0        | 0.631579 | 0.110665 |
| 208          | 12      | 1    | 0        | 42.11%               | 0.57895 | 0.01283   | 0.11327 | 198.31579 | 208            | 12      | 1    | 0        | 0.578947 | 0.113269 |
| 212          | 11      | 1    | 0        | 47.37%               | 0.52632 | 0.01312   | 0.11455 | 200.63158 | 212            | 11      | 1    | 0        | 0.526316 | 0.113459 |
| 216          | 10      | 1    | 1        | 52.63%               | 0.47368 | 0.01312   | 0.11455 | 202.73684 | 216            | 10      | 1    | 1        | 0.473684 | 0.114549 |
| 220          | 8       | 1    | 0        | 58.55%               | 0.41447 | 0.01311   | 0.11452 | 204.63158 | 220            | 8       | 1    | 0        | 0.414474 | 0.114515 |
| 227          | 7       | 2    | 0        | 64.47%               | 0.35526 | 0.01264   | 0.11243 | 207.53289 | 227            | 7       | 1    | 0        | 0.355263 | 0.112426 |
| 230          | 6       | 1    | 0        | 70.39%               | 0.29605 | 0.0117    | 0.10816 | 208.59868 | 230            | 6       | 1    | 0        | 0.296053 | 0.108162 |
| 235          | 5       | 1    | 0        | 76.32%               | 0.23684 | 0.01029   | 0.10145 | 210.07895 | 235            | 5       | 1    | 0        | 0.236842 | 0.10145  |
| 244          | 4       | 0    | 1        | 76.32%               | 0.23684 | 0.01029   | 0.10145 | 212.21053 | 244            | 4       | 0    | 1        | 0.236842 | 0.10145  |
| 246          | 3       | 1    | 0        | 84.21%               | 0.15789 | 0.00873   | 0.09343 | 212.68421 | 246            | 3       | 1    | 0        | 0.157895 | 0.093431 |
| 265          | 2       | 1    | 0        | 92.11%               | 0.07895 | 0.0053    | 0.07279 | 215.68421 | 265            | 2       | 1    | 0        | 0.078947 | 0.072792 |
| 303          | 1       | 1    | 0        | 100.00%              | 0       | 0         | 0       | 218.68421 | 303            | 1       | 1    | 0        | 0        | *        |

| OASIS Result         |                                          |  | Reference Data       |                                          |  |
|----------------------|------------------------------------------|--|----------------------|------------------------------------------|--|
| Median Survival Time | [ Brookmeyer-Crowley 95% Conf. Interval] |  | Median Survival Time | [ Brookmeyer-Crowley 95% Conf. Interval] |  |
| 216                  | 192 230                                  |  | 216                  | 192 230                                  |  |
