# Supplementary material for: OASIS: Online Application for the Survival Analysis of Lifespan Assays Performed in Aging Research
Source: PubMed Central journal article supplement (PMC3156233; doi:10.1371/journal.pone.0023525), 2011-08-15
Supplement: pone.0023525.s004.pdf [file pone.0023525.s004.pdf]

Table S3. Web-based statistical methods for survival analysis

|                     | Description                    | URL                                                                                                                                               |
|---------------------|--------------------------------|---------------------------------------------------------------------------------------------------------------------------------------------------|
| Statistical Test    | Wilcoxon signed-rank test      | <a href="http://faculty.vassar.edu/lowry/wilcoxon.html">http://faculty.vassar.edu/lowry/wilcoxon.html</a>                                         |
|                     | Wilcoxon rank sum test         | <a href="http://elegans.swmed.edu/~leon/stats/utest.html">http://elegans.swmed.edu/~leon/stats/utest.html</a>                                     |
|                     | Fisher's exact test            | <a href="http://www.socr.ucla.edu/htmls/ana/FishersExactTest_Analysis.html">http://www.socr.ucla.edu/htmls/ana/FishersExactTest_Analysis.html</a> |
|                     | Fisher's exact test            | <a href="http://faculty.vassar.edu/lowry/fisher.html">http://faculty.vassar.edu/lowry/fisher.html</a>                                             |
|                     | Fisher's exact test            | <a href="http://www.langsrud.com/fisher.htm">http://www.langsrud.com/fisher.htm</a>                                                               |
| Lifespan Statistics | Log Rank Test                  | <a href="http://bioinf.wehi.edu.au/software/russell/logrank/index.html">http://bioinf.wehi.edu.au/software/russell/logrank/index.html</a>         |
|                     | Kaplan-Meier survival function | <a href="http://www.hutchon.net/Kaplan-Meier.htm">http://www.hutchon.net/Kaplan-Meier.htm</a>                                                     |
|                     | SURVSOF                        | <a href="http://www.krebsregister-bayern.de/software_e.html">http://www.krebsregister-bayern.de/software_e.html</a>                               |
